# Supplementary material for: Brain derived neurotrophic factor declines after complete curative resection in gastrointestinal cancer
Source: PeerJ. 2021 Jul 30;9:e11718. doi: 10.7717/peerj.11718 (PMC8327966; doi:10.7717/peerj.11718)
Supplement: Supplemental Information 1 [file peerj-09-11718-s001.xlsx]

## Sheet: Arkusz1
Name	Sex	ICD 10 classification	resection=1	BDNF preop.	BDNF"3"postop.	T	N	M	R	Deposits of neoplasm	Angioinvasion	Neuroinvasion	Resected nodes	Infiltrated nodes	Infiltrated/resected ratio	G	UICC stage	Dukes stage	histhopatology	tumour size	tumour volume
xxxx	1	1	0	24498.8	22811.9							1					4	D	adenoca dissemination
xxxx	1	1	1	28879.8	26288	3	1a	x		0	0	0	10	1	0.1	2	3	C	adenoca	8x3,5x5	140
xxxx	1	1	1	10234.3	14861.5	3	2b	0	0		1	0	13	9	0.7	2	3b	C	adenoca	3x3x3	27
xxxx	2	1	0	23751.9	15688.9												4	D	adenoca dissemination
xxxx	1	1	1	28831.8	28994.3														adenoca in sampling, no data available at the moment of statistical analisys
xxxx	1	1	1	37686.5	30787.6	2	0	x	0	0	0	0	12	0	0	2	1	A	adenoca	3,5x4x1,3	18.2
xxxx	2	1	0	36390.9	33235												4	D	adenoca dissemination
xxxx	2	1	1	29573.1	19528.3	3	1a	1	0		1		8	1	0.13	x	4	D	adenoca	2x2x1,5	6
xxxx	2	1	1	18634.9	20717.3	2	0	x	0	0	0	0	8	0	0	2	1	A	adenoca	4x4x4	64
xxxx	2	1	1	35532.2	40138.2	Tis, after polipectomy											1a		adenoca
xxxx	2	1	1	30891.1	22764.8	3	1a	x	0	0	0	0	13	1	0.077	2	2	B	adenoca	7x6x5x	210
xxxx	1	1	0	16759.5	12740.5												4	D	adenoca dissemination
xxxx	2	1	1	17227.8	12247.9	4b	2b	1c	0		1	1	11	8	0.73	3	4	D	adenoca	8x4,5	36
xxxx	1	1	1	31593.8	20662.4	2	0	0	0	0	0	0	16	0	0	2	1	A	adenoca	5x4x1	20
xxxx	2	1	1	25969.6	16048.8	3	0	x	0	0	0	0	10	0	0	1	2a	B	adenoca	3,5x3,5x1	12.25
xxxx	2	1	1	22033	47046.6														adenoca in sampling, no data available at the moment of statistical analisys	3,5x3x3	31.5
xxxx	2	1	1	23640.8	6194.5	2	0	x	0	0	0	0	11	0	0	2	2	B	adenoca	2x1	2
xxxx	1	1	1	30682.5	36895.6	3	1b	x	0		1	1	18		0.11	2	3b	C	adenoca
xxxx	2	1	1	21780	20598.2	4a	1c	0	0	1	1	0	18	0	0	2	3b	C	adenoca	3,5x6,5x4	91
xxxx	2	1	1	25950.5	23078.3	3	1a	x	0	0	1	0	41		0.02	2	3b	C	adenoca	9x10x3,5	315
xxxx	2	1	1	24010.4	24204.9	3	1c	0	0	1	0	0	6	0	0	2	3b	C	adenoca	4x3x2	24
xxxx	1	1	0	28408.8	22442.8												4	D	adenoca dissemination
xxxx	1	1	1	44236.4	21587.5	2	0	x	0	0	0	0	10	0	0	1	1	A	adenoca	1,3x1,3x1,3	2.2
xxxx	2	1	1	40028.4	33643.1	3	0	0	0	0	1	0	16	0	0	2	2	B	adenoca	7x6x2	84
xxxx	2	1	1	38642.7	22829.9	3	2a	0	0	0	1	0	7	4	0.57	2	3b	C	adenoca	2,5x2,5x2,5	15.62
xxxx	2	1	1	21399	18930.9	2	0	x	0	0	1	0	10	0	0	2	1	A	adenoca	3.5x3x1	10.5
xxxx	2	1	1	24824.2	16817.9	2	0	0	0	0	0	0	14	0	0		1	A	adenoca mucinous	8,5x5x3,5	148.75
xxxx	1	1	1	39776.6	44380.4	3	1c	0	0	0	0	0	2	0	0	2	3	C	adenoca	4x7x1	28
xxxx	1	1	1	25014.1	36082.8	Tis, after polipectomy											1a		adenoca
xxxx	1	1	1	26210.6	37627.2	2	0	x	0	0	0	0	9	0	0	2	1	A	adenoca	4x3,5x1	14
xxxx	2	1	1	14481.2	18974	2	0	x	0	0	0	0	14	0	0	1	1	A	adenoca partim mucinosum	3,5x4x,0,8	11.2
xxxx	1	1	1	37869.5	19487	1	0	x	0	0	0	0	13	0	0	1	1	A	adenoca partim mucinosum	3x1,5	4.5
xxxx	1	1	1	18055	14381.2														adenoca in sampling, no data available at the moment of statistical analisys
xxxx	1	1	1	22087.2	26891.2	3	0	0	0		0	0	13	0	0	2	2a	B	adenoca	3x3x2	18
xxxx	1	1	1	14381.2	9524.32														adenoca in sampling, no data available at the moment of statistical analisys
xxxx	1	1	1	27107.6	18875.7	2	0	x	0	0	0	0	12	0	0	2	1	A	adenoca	4,3x3x2	25.8
xxxx	1	1	1	30614.2	22162.4	3	1c	x	0	1	0	0	21	0	0	2	3b	C	adenoca	5,5x5x2	55
xxxx	1	1	1	23888.5	34070.1	3	0	x	0	0	0	0	13	0	0	2	2a	B	adenoca	10x7x2,5	175
xxxx	1	1	1	23119.2	12946.9	ypT3	0	0	0	0	0	0	7	0	0	x	2	B	adenoca	5x5x2	50
xxxx	2	1	1	22727.3	18055														adenoca in sampling, no data available at the moment of statistical analisys
xxxx	2	1	0	28477.8	25627.9												4	D	adenoca dissemination
xxxx	2	1	1	21144	24744	4	1a	0	0	0	0	0	28	1	0.04		3b	C	adenoca	15x11x10	1650
xxxx	2	1	1	13047.1	11864.6	4	0	x	0	0	0	0	14	0	0	2	2c	B	adenoca	11x10x11	1210
xxxx	2	1	1	29666	21098.7	3	1a	0	0	0	1	0	6	1	0.17	2	3b	C	adenoca	5,2x4,2x3	65.52
xxxx	2	1	0	30295.2	19280.3												4	D	adenoca dissemination
xxxx	2	1	1	33000.8	37649.3	3	1a	1a	0	0	0	0	9	1	0.111	2	4	D	adenoca	3x3,4x0,8	8.16
xxxx	1	1	1	34436.4	22133.2	3	0	x	0		0	0	5	0	0	2	2a	B	adenoca	2.5x1.5x0.5	1.88
xxxx	2	1	1	22477.5	24588	2	0	x	0	0	0	0	9	0	0	2	1	A	adenoca	5x3,5x0,8	14
xxxx	2	1	1	41241.5	17792.6	2	0	x	0	0	0	0	8	0	0		1	A	adenoca	3,5x7x0,6	14.7
xxxx	1	1	1	13988.2	16934.7	2	0	0	0	0	0	0	16	0	0	2	1	A	adenoca	2,5x2x0,5	2.5
xxxx	1	2	0	76814.8	31546.9												4		adenoca dissemination
xxxx	2	2	1	36006.9	17982.7	Tis											1		adenoca
xxxx	1	2	0	10023.1	11462												4		adenoca dissemination
xxxx	1	2	1	17640.1	15803.8	3	0	0	0		0	1	8	0	0	2	2a		adenoca	3x3	9
xxxx	1	2	1	29037	13820.5	Tis											1		adenoca
xxxx	1	2	1	5888.9	13458.5	4	1	0	1		1	1	7	2	0.3	2	3		adenoca	8x8	64
xxxx	1	2	1	41022.4	14121.1	4	1	x	1	0	1	1	9	3	0.333	2	3		adenoca	4x4x4	64
xxxx	2	2	0	18952.6	7212.43												4		adenoca dissemination
xxxx	1	2	0	20598.2	21062.3												4		adenoca dissemination
xxxx	2	2	1	44688.6	37212.4	1	0	0	0	0	0	0				1	1		adenoca
xxxx	2	2	1	37046.7	25420.1	3	1	0	0	0	0	0	5	1	0.2	2	3		adenoca	7x3x4	84
xxxx	1	2	0	11308.8	19838.7			1a									4		adenoca dissemination
xxxx	2	2	1	7674.16	4467.06	3	1	x	0	0	0	0	11	3	0.273	2	3		adenoca	9x10x9	810
xxxx	1	2	0	41032.5	29726.3												4		adenoca dissemination
xxxx	1	2	1	25973	10667	3	1	x	2	0	1	1	6	2	0.33	2	3		adenoca	3,5x2x2	14
xxxx	2	2	1	14184.8	10118.4				0	0	0	0	1	0	0	3	2		adenoca	4,5x1,4	6.3
xxxx	2	2	1	5104.81	22025.3	3	1	0	1	0	0	0	15	2	0.13	2	3		adenoca	2x2x2	8
xxxx	2	2	0	25284	27390.3												4		adenoca dissemination
xxxx	1	2	1	24316.8	20037.2	3	0	x	1	0	0	0	5	0	0	2	2		adenoca	2,5x2x1,5	7.5
xxxx	1	2	1	20658.6	12661.7					0	0	1	4	2	0.5	2	2		adenoca	4x4	16
xxxx	2	2	0	24006.3	22888.6					0							4		adenoca dissemination
xxxx	2	2	0	26517.4	14175.7					0							4		adenoca dissemination
xxxx	2	2	0	23526.5	26883.2												4		adenoca dissemination
xxxx	2	2	1	31757.7	16817.9	1	0	0	0	0	0	0	10	0	0	2	1a		adenoca
xxxx	2	2	1	15545.5	15459.6	3	0	x	1	0	0	0	8	0	0	2	2		adenoca	4,5x4x7	126
xxxx	2	3		37398.4	25306.8
xxxx	1	3		11623.8	19648.7
xxxx	2	3		25979.3	20567.4
xxxx	2	3		24399.9	16788.7
xxxx	2	3		32227	20690.8
xxxx	1	3		12905.5	16468.5
xxxx	2	3		22854.5	2308.2
xxxx	2	3		18622.1	19679.1
xxxx	2	3		71245.2	56631.4
xxxx	2	3		31865.7	23687.4
xxxx	2	3		9341.51	9107.23
xxxx	2	3		26366.9	16392.2
xxxx	2	3		17315.9	12411.7
xxxx	2	3		11300.5	25152.3
xxxx	1	3		25152.3	20721.7
xxxx	2	3		29682.2	28251.6
xxxx	1	3		35634.1	37241.3
xxxx	1	3		26647.8	13126.1
xxxx	2	3		36932.2	43002.4
xxxx	2	3		20783.5	20938.2
	1=woman	1 colon cancer				RCC=renal cell carcinoma
	2=man	2 pancreatic cancer
		3 inguinal hernia
